# Supplementary material for: Rapid Evaluation of the Xpert ® Xpress CoV-2 Plus and Xpert® Xpress CoV-2/Flu/RSV Plus Tests
Source: Preprints.org preprint supplement (doi:10.20944/preprints202212.0073.v1), 2022-12-05
Supplement: Supplementary file 1 [file supplementary]

Supplementary Table 1

*Supplementary Table 1: Performance of the Xpert® Xpress CoV-2 plus test compared to standard of care (SOC) results and reference material.*

*SOC (cobas® SARS-CoV-2, TaqPath COVID-19), Xpert® Xpress SARS-CoV-2 and Xpert® Xpress CoV-2 plus results are shown, including Ct values. Residual clinical specimens are sorted according to SOC ORF1ab Ct values. SARS-CoV-2 positive results are shown in red and SARS-CoV-2 negative results are shown in green.*

*Specimens include residual respiratory clinical specimens and AccuPlex SARS-CoV-2 reference material. SARS-CoV-2 variants of concern (VOC) include genotyped wildtype (Wuhan with D614G), Alpha, Beta, Gamma (AccuPlex only), Delta and Omicron BA.1 and BA.4 (clinical only) VOC. Where specimens were not genotyped, the wave across the four major waves in South Africa is given as an indicator of likely VOC: Wildtype (Wuhan with D614G): April-July 2020; Beta: November 2020-January 2021; Alpha/Delta: May-July 2021; Omicron: October 2021-April 2022. Limited reference material (AccuPlex SARS-CoV-2 or AccuPlex SARS-CoV-2 Variants Panels 1 and 2, LGC SeraCare, Milford, MA, USA) was also included in the study.*

*Gene targets refer to the SARS-CoV-2 envelope (E), nucleocapsid 2 (N2), open reading frame 1ab (ORF1ab) and RNA-dependant RNA polymerase (RdRp) genes. Ct: cycle threshold; i2: interwave period 2 (the time between waves 2 and 3); SOC: standard of care, SPC: sample processing control; VOC: variants of concern.*

Supplementary Table 2

*Supplementary Table 2: Performance of the Xpert® Xpress CoV-2/Flu/RSV plus test compared to standard of care (SOC) results and reference material.*

*SOC (TaqMan™ TaqPath COVID-19; AllPlex™ SARS-CoV-2; Xpert® Xpress SARS-CoV-2 and cobas® SARS-CoV-2; AllPlex™ SARS-CoV-2/FluA/FluB/RSV) and Xpert® Xpress CoV-2/Flu/RSV plus results are shown, including Ct values. Residual respiratory specimens are sorted by pathogen (Flu A, Flu B, RSV or SARS-COV-2) and Ct value. Residual respiratory clinical SARS-CoV-2 specimens are sorted according to SOC ORF1ab Ct values. Specimens include residual clinical specimens and AccuPlex SARS-CoV-2 reference material. SARS-CoV-2 variants of concern (VOC) include genotyped wildtype (Wuhan (AccuPlex only); Wuhan with D614G (respiratory specimens)), Alpha, Beta, Gamma (AccuPlex only), Delta and Omicron BA.1 VOC. Respiratory pathogen positive results are shown in red and negative results are shown in green.*

*Gene targets refer to the SARS-CoV-2 envelope (E), nucleocapsid 2 (N2), open reading frame 1ab (ORF1ab) and RNA-dependant RNA polymerase (RdRp), and spike (S) genes. CoV-2 (SARS-CoV-2: severe acute respiratory syndrome 2; Ct: cycle threshold; cp/mL: copies per millilitre; Flu A1/2: influenza A (targets 1 or 2); Flu B: influenza B; RSV: respiratory syncytial virus; SOC: standard of care, SPC: sample processing control; VOC: variants of concern.*
